# Supplementary material for: Pretreatment radiomic biomarker for immunotherapy responder prediction in stage IB–IV NSCLC (LCDigital-IO Study): a multicenter retrospective study
Source: PubMed Central journal article supplement — J Immunother Cancer. 2023 Oct 20;11(10):e007369. doi: 10.1136/jitc-2023-007369 (PMC10603353; doi:10.1136/jitc-2023-007369), 2023-10-20
Supplement: jitc-2023-007369supp001.pdf [file jitc-2023-007369supp001.pdf]

---

Radiomics Biomarker for Immunotherapy in IB-IV Stage NSCLC

---

1 **Pretreatment radiomic biomarker for immunotherapy responder prediction in stage**

2 **IB-IV NSCLC (LCDigital-IO Study): A multi-center retrospective study**

3 **Appendix S1:** The Detailed Inclusion and Exclusion Criteria.

4 For cohort D1-D3, the inclusion criteria were as follows: (1) more than 18 years old, (2) first  
5 dose of anti-PD- (L)-1 immunotherapy were received in Guangdong Provincial People's  
6 Hospital or Jiangxi Cancer Hospital, (3) Patients with advanced NSCLC confirmed  
7 pathologically, (4) a follow-up period of at least 6 months. The exclusion criteria were as  
8 follows: (1) lack of chest thin-slice ( $\leq 5$ mm) enhanced CT image within 30 days before the  
9 first immunotherapy, (2) missing or incomplete necessary clinicopathological variables, (3)  
10 poor image quality (e.g., motion and speed propagation, refraction artifacts or low-resolution  
11 image), (4) patients with unilateral multifocal cancers, (5) received other therapy meanwhile,  
12 (6) suffering other malignancies simultaneously, (7) pulmonary lesions were poorly  
13 discriminated from other lesions or adjacent tissues.

14 **Appendix S2:** Summary for Package Usage.

15 For the radiomic signature extraction, we used "SlicerRadiomics" package on the platform of  
16 3D Slicer (<http://www.slicer.org>). The Least absolute shrinkage and selection operator  
17 algorithm was adopted using R package named "glmnet" (version 4.1.3;  
18 <http://www.r-project.org/>). The AUC is calculated by the R package named "pROC". The  
19 decision curve was calculated via the R package named "decisionCurve". We drew  
20 Kaplan-Meier curves by the R packages named "survival" and "survminer". For the  
21 multivariate analysis of clinical characteristics and the radiomic biomarker CRS, we  
22 determined the interaction of the variables in survival analysis using SPSS version 23.0 (IBM,

---

Radiomics Biomarker for Immunotherapy in IB-IV Stage NSCLC

---

23 Armonk, NY). The R package "limma" was used to identify differentially expressed genes  
24 (DEGs) between high-risk and low-risk groups based on the radiomic signature. Single  
25 sample Gene Set Enrichment Analysis (ssGSEA) was conducted via R package "GSVA".

26 **Appendix S3:** Acquisition of Computed Tomography (CT) Images.

27 Thoracic CT examinations in GDPH were performed using one of two multidetector CT  
28 systems (LightSpeed 8; GE Healthcare, Hino, Japan; 64-slice VCT, GE Healthcare,  
29 Milwaukee, WI). Scanning parameters were as follows: 120 kVp, 150–200 mA, detector  
30 collimation of  $8 \times 1.25$  mm or  $64 \times 0.625$  mm; field of view of  $350$  mm  $\times$   $350$  mm; matrix of  
31  $512 \times 512$ , and reconstruction thickness of 1.25-mm with a 1.25-mm reconstruction interval.  
32 Nonionic iodinated contrast material (370 mg iodine/mL, Ultravist; Bayer Pharma, Berlin,  
33 Germany) was injected into the antecubital vein at a dose of 1.3–1.5 mL/kg of body weight at  
34 a rate of 2.5 mL/s using an automated injector (Ulrich CT Plus 150; Ulrich Medical, Ulm,  
35 Germany). CT scanning was performed with a 25-second delay after contrast agent injection.  
36 In JXCH, CT examinations was performed in a single CT system (Somatom Definition Edge,  
37 Siemens Healthineers, Germany, 64-slice VCT). The parameters of the images were as  
38 follows: 80-130 kV; 130 mAs; rotation time of 0.4-/0.6s; detector collimation of  $64 \times 0.625$   
39 mm; field of view of  $350$  mm  $\times$   $350$  mm; matrix,  $512 \times 512$ . Gastrografin was applied as  
40 contrast material (76% compound meglumine diatrizoate injection, 20 ml/ampule, containing  
41 15.2 g meglumine diatrizoate and sodium diatrizoate; Shanghai Xudong Haipu  
42 Pharmaceutical Co., Ltd., Shanghai, China) and was injected into the antecubital vein at a  
43 dose of 1.2–1.6 mL/kg of body weight at a rate of 3 mL/s using an automated injector  
44 (SinoPower-S; Sinomdt Medical Equipment Co., Ltd., Shenzhen, China). CT scanning was

---

Radiomics Biomarker for Immunotherapy in IB-IV Stage NSCLC

---

45 performed with a 30-second delay after contrast agent injection. The CT images were  
46 retrieved using the picture archiving and communication system (PACS; Carestream, Canada)  
47 at each institution.

48 **Appendix S4: Imaging Processing and ROI Segmentation.**

49 Before feature extraction, the voxel size of all slices was resampled to 1 mm × 1 mm × 1 mm.  
50 A total of 851 features were extracted from each mask via SlicerRadiomics package on the  
51 3DSlicer platform (version 4.10.2, www.slicer.org), including 14 shape-based features, 18  
52 first-order statistical features, 75 textural features from original images and 744 derived  
53 features. The features were then normalized with the z-scores of the training and validation  
54 cohorts using the mean and standard deviation derived from the features of the training cohort.  
55 The formula used is as follows:  $Z=(X-\bar{x})/SD$  where X represents the value of each selected  
56 feature in a patient, while Z represents the corresponding normalized value.  $\bar{x}$  represent the  
57 mean of the values of the feature and SD is the standard deviation in the training cohort. The  
58 segmentation was implemented by a preliminary semi-automatic segmentation module  
59 according to the level tracing and intensity threshold segmentation tool. Then the manual  
60 corrections such as relabeling and hole filling were done by S.Y.W (with 14 years of  
61 experience) and G.Y.W (with 18 years of experience). Radiologist L.L. (with 23 years of  
62 experience) assessed all tumor segmentations. Any disagreements were resolved by  
63 discussions between the three radiologists mentioned and three thoracic surgeons (Q.G.B.,  
64 Z.D.K., and H.Y.Z.). The modules of logical operation and hollow helps us to automatically  
65 generalize the peri-tumoral segmentations according to the segmented tumoral region.

66 **Appendix S5: Feature extraction and selection.**

---

Radiomics Biomarker for Immunotherapy in IB-IV Stage NSCLC

---

67 There are 4255 quantitative radiomic features in all, which include first-order statistics, shape,  
68 gray-level cooccurrence matrix (GLCM), gray-level size zone matrix (GLSZM), gray-level  
69 dependence matrix (GLDM), neighborhood gray-tone difference matrix (NGTDM) and the  
70 corresponding wavelet-transformed features, which were extracted from five segmented  
71 regions (tumoral/peritumoral 0-5mm/5-10mm/10-15mm/15-20mm, 851 features for each  
72 segment). RIDER dataset is an online available dataset<sup>1</sup>, which includes 31 patients, each  
73 patient having been scanned twice on a CT scanner with an interval of approximately 15  
74 minutes. For each radiomic feature extracted, the intraclass correlation coefficient (ICC) was  
75 calculated to quantify reproducibility between the test–retest scans (RIDER). Because ICC  
76 describes the similarity of units in the same group, features with high ICC values are thus  
77 more reproducible and potentially more robust to variations in CT scanners and acquisition  
78 parameters. Only the features with ICC cutoff >0.75 were identified as stable and  
79 reproducible features (n=3630). In order to assess the multi-collinearity of the characteristics,  
80 the Spearman correlation analysis was conducted and the correlation coefficients among the  
81 features were determined. Only the feature with a superior diagnostic performance was kept if  
82 any pair of features had a coefficient value of > 0.80 or < -0.80. Within all stable features  
83 (n=2285) we continued the further feature selection. The least absolute shrinkage and  
84 selection operator (LASSO) algorithm was next applied to filter out redundant and  
85 uninformative features. We used step-wise binomial logistic regression for the selected  
86 features to construct the radiomic signatures.

87 **Appendix S6:** The Effect of Tumor Volume on CRS and Clinical Outcome.

88 To evaluate the association between radiomic score and tumor volume, we calculated the

## Radiomics Biomarker for Immunotherapy in IB-IV Stage NSCLC

89 Pearson coefficient between them (seen in **Supple table.6a**), and no significant association  
90 was observed ( $p > 0.05$ ). Tumor volume is calculated by  $V = \pi(a * b * c)/6$ , where a, b, c are  
91 the linear dimensions of the tumor<sup>2</sup>. To assess the confounding effect of tumor volume on  
92 CRS for DCB prediction, a binary logistics regression was conducted where tumor volume  
93 was set as a control variable. From **supplemental table.6b**, we found tumor volume is not  
94 associated with patients' response status in neither univariate nor bivariate analysis. For  
95 long-term survival, a univariate analysis was conducted for the tumor volume on PFS and OS.  
96 The analysis showed poor stratification for both PFS ( $p=0.948$ ) and OS ( $p=0.753$ ).  
97 Subsequently we combined tumor volume with CRS for a two-variate analysis on OS and  
98 PFS to evaluate the confounding effect. We found that tumor volume has nearly no effect on  
99 long-term survival (PFS: HR=1,  $p=0.997$ ; OS: HR=1,  $p=0.753$ , **Supple table.6c**) while CRS  
100 still shows good stratification for both PFS (HR=0.487,  $p=0.002$ ) and OS (HR=0.484,  
101  $p=0.022$ ).

102 **Appendix S7: Assessment of Model and Statistics Methods.**

103 1. The Hosmer-Lemeshow test was used to assess model goodness of fit, where we  
104 compared the computed Hosmer-Lemeshow statistic to a chi-squared distribution with 8  
105 degrees of freedom to calculate the p-value. Hosmer-Lemeshow statistic was calculated  
106 as follows:

$$107 \quad H = \sum_{q=1}^{10} \left( \frac{(\text{Observed.DCB} - \text{Expected.DCB})^2}{\text{Expected.DCB}} + \frac{(\text{Observed. not DCB} - \text{Expected.not DCB})^2}{\text{Expected.not DCB}} \right)$$

108 2. DCAs was applied to assess the utility of the three signatures by calculating the net  
109 benefit at various probability thresholds<sup>3</sup>. In our study, threshold probability is the value

---

Radiomics Biomarker for Immunotherapy in IB-IV Stage NSCLC

---

110 of the lowest suspected probability of DCB where the physician still may advise the  
111 patient to receive immunotherapy after balancing the benefit and harmfulness. As  
112 illustrated in the background section, the immunotherapy response rate is still limited.  
113 And the adverse effect remains a major concern with 28.7% of 3-5 grades treatment  
114 related adverse events for patients receiving ICIs monotherapy<sup>4</sup>. Therefore, the  
115 probability threshold in clinical practice would not be low (for example, 10%), and it  
116 varies among different physicians and patients when they decide to receive  
117 immunotherapy. According to the decision curves shown in Figure 3D and Figure S9, the  
118 CRS and RADClI signatures both always showed more net benefit than the clinical  
119 signature in predicting the probability of DCB. And they are consistently applicable when  
120 the probability threshold was between 5% to 97%, which was wide-range and consistent  
121 with clinical practice.

122 3. Lesion Choice Strategy Subgroup Analysis

123 We applied the thoracic CT image for radiomic analysis, which was routinely and widely  
124 used in clinical practice. The pulmonary lesion choice strategy is certain and adaptive to  
125 the clinical practice, that is: First, only pulmonary lesion was chosen. Secondly,  
126 principally the primary pulmonary lesion was chosen as target lesion. Thirdly, the largest  
127 pulmonary lesion was the candidate choice for patients whose primary lesion cannot be  
128 certainly determined since first admission. To evaluate the impact on prediction brought  
129 by lesion choice strategy, we performed a subgroup analysis for patients of different  
130 lesion choices. Two choice strategies do not show significant difference on DCB  
131 prediction in both cohort D2 ( $AUC_{\text{primary}}=0.629$ , 95% CI: 0.435-0.824;  $AUC_{\text{largest}}=0.767$ ,

## Radiomics Biomarker for Immunotherapy in IB-IV Stage NSCLC

132 95% CI: 0.460-1,  $p=0.466$ ) and D3 ( $AUC_{\text{primary}}=0.887$ , 95% CI: 0.772-1,  $AUC_{\text{largest}}=0.714$ ,  
133 95% CI: 0.379-1,  $p=0.357$ , Fig. S10). Due to the unbalanced ratio of patients of two  
134 lesion choice strategies, we combined two independent test sets D2 and D3 to make the  
135 two groups more comparable ( $N=105$ ,  $N_{\text{primary}} = 81$ ,  $AUC=0.769$ , 95% CI: 0.654-0.883;  
136  $N_{\text{largest}}=24$ ,  $AUC=0.736$ , 95% CI: 0.523-0.948). The DeLong test showed that no  
137 significant difference of the prediction was observed between the two groups ( $p= 0.791$ ).

## 138 4. Survival analysis grouping

139 The predicted DCB and NCB groups were based on the optimal cut-off of this score on  
140 the training cohort. The optimal cut-off is obtained by maximizing the Youden index  
141 (Youden index = Sensitivity + Specificity - 1), ensuring the best overall performance of  
142 the signature. Based on the prediction, two predicted groups were generated and showed  
143 distinct survival outcomes in survival analysis.

144 5. The two-way random ICC test was applied to measure the reliability of the radiomic features  
145 between two-observer image segmentation and feature extraction process. The agreement  
146 levels are defined regarding ICC values: excellent ( $ICC \geq 0.81$ ), good ( $0.61 < ICC < 0.8$ ),  
147 moderate ( $0.41 < ICC < 0.60$ ), and poor ( $ICC \leq 0.40$ ). TableS8 summarizes the results of the  
148 inter-rater agreement analysis. Radiomic features in the CRS show good to excellent  
149 inter-rater reliability ( $ICC=0.72$  to  $0.99$ ).

150 **Appendix 8:** Algorithm Selection.

151 Different algorithms have been tested during pre-study period. We conducted a  
152 pre-experiment comparing four different algorithms configurations (seen in Table S7). In this  
153 analysis, we selected the final configuration by comparing their performance on the validation

---

Radiomics Biomarker for Immunotherapy in IB-IV Stage NSCLC

---

154 set. We chose LASSO and stepwise logistic regression as candidate classifier because this  
155 configuration reached the highest performance with the least amount of overfitting.

156 **Captions for supplemental tables and figures.**

157 **Table S1.** Clinicopathological characteristics of D1-D3 cohorts

158 **Table S2.** The performance of different radiomic signatures in cohorts

159 **Table S3.** The comparison of performance of different peri-tumoral radiomic signatures based  
160 on AIC and DeLong test

161 **Table S4.** The coefficient of p value and Hazard ratio for Log-Rank test in clinical variables  
162 on PFS and OS

163 **Table S5.** Odds ratio of clinical variables via univariate and multivariate logistics analysis

164 **Table S6.** Evaluation of tumor volume on CRS and clinical outcome

165 **Table. S7.** The performance of different algorithms on training set and validation set.

166 **Table. S8.** Table S8 Inter-observer variability analysis of radiomic feature extraction.

167 **Figure S1.** Study design. The discovery dataset was used to train the radiomic signature. Four  
168 cohorts were used for validation. The Cancer Genome Atlas dataset comprised RNA-seq data  
169 and the corresponding imaging data from The Cancer Imaging Archive. The surgical cohort  
170 contained patients receiving radical surgery after receiving immunotherapy. RNA-seq=RNA  
171 sequencing. DICOMS=Digital Imaging and Communications in Medicine.

172 **Figure S2.** LASSO coefficient profiles of the retained 851 features. A coefficient profile plot  
173 was produced against the log ( $\lambda$ ) sequence. Vertical line was drawn at the value selected  
174 using 10-fold cross-validation, where optimal  $\lambda$  resulted in 2 tumoral-features and 7 peritumor  
175 features with nonzero coefficients.



## Radiomics Biomarker for Immunotherapy in IB-IV Stage NSCLC

- 176 **Figure S3.** Calibration curve analysis for CRS in training and validation cohorts.
- 177 **Figure S4.** Performance and evaluation of clinical signature. (A) ROC curves with AUC of  
178 0.76 (95%CI: 0.674-0.846) in training cohort and (B) 0.66 (95%CI: 0.509-0.811) in validation  
179 cohort. (C) Calibration curve for training and (D) validation cohort.
- 180 **Figure S5.** Calibration curve of RADCli(nomogram) in (A) training cohort and (B) validation  
181 cohort.
- 182 **Figure S6.** Kaplan-Meier survival curves stratified by optimal cutoff of PD-L1 expression for  
183 OS(A) and PFS(B) in PD-L1 subset, Kaplan-Meier survival curves stratified by classification  
184 based on CRS for OS(C) and PFS(D) for the PD-L1 subset (n=138).
- 185 **Figure S7.** The Kaplan-Meier survival analysis for CRS in TCGA-NSCLC cohort.
- 186 **Figure S8.** Gene Ontology annotation of differentially expressed genes in TCGA-NSCLC  
187 cohort.
- 188 **Figure S9.** Decision curve analysis for the RADCli nomogram (red), CRS signature (blue),  
189 and clinical model (green) with corresponding confidence intervals represented by dashed  
190 lines.
- 191 **Figure S10.** The ROC analysis of subgroup evaluation for different lesion choice strategies in  
192 external cohorts. (A) Cohort D2. (B) Cohort D3. (C) Cohort D2 and D3.
- 193 **Reference.**
- 194 1 Armato SG, Meyer CR, McNitt-Gray MF, *et al.* The Reference Image Database to  
195 Evaluate Response to therapy in lung cancer (RIDER) project: A resource for the  
196 development of change-analysis software. *Clin Pharmacol Ther.* 2008; **84**: 448–56.
- 197 2 Mayr NA, Taoka T, Yuh WTC, *et al.* Method and timing of tumor volume measurement

---

Radiomics Biomarker for Immunotherapy in IB-IV Stage NSCLC

---

- 198 for outcome prediction in cervical cancer using magnetic resonance imaging. *Int J*  
199 *Radiat Oncol Biol Phys* 2002; **52**: 14–22.
- 200 3 Vickers AJ, Cronin AM, Elkin EB, Gonen M. Extensions to decision curve analysis, a  
201 novel method for evaluating diagnostic tests, prediction models and molecular markers.  
202 *BMC Med Inform Decis Mak* 2008; **8**. DOI:10.1186/1472-6947-8-53.
- 203 4 Alifu M, Tao M, Chen X, Chen J, Tang K, Tang Y. Checkpoint inhibitors as dual  
204 immunotherapy in advanced non-small cell lung cancer: a meta-analysis. *Front Oncol*  
205 2023; **13**: 1146905.
- 206
- 207
