# Supplementary material for: Pretreatment radiomic biomarker for immunotherapy responder prediction in stage IB–IV NSCLC (LCDigital-IO Study): a multicenter retrospective study
Source: PubMed Central journal article supplement — J Immunother Cancer. 2023 Oct 20;11(10):e007369. doi: 10.1136/jitc-2023-007369 (PMC10603353; doi:10.1136/jitc-2023-007369), 2023-10-20

**A. ROC of subgroup analysis for leison choice in cohort D2**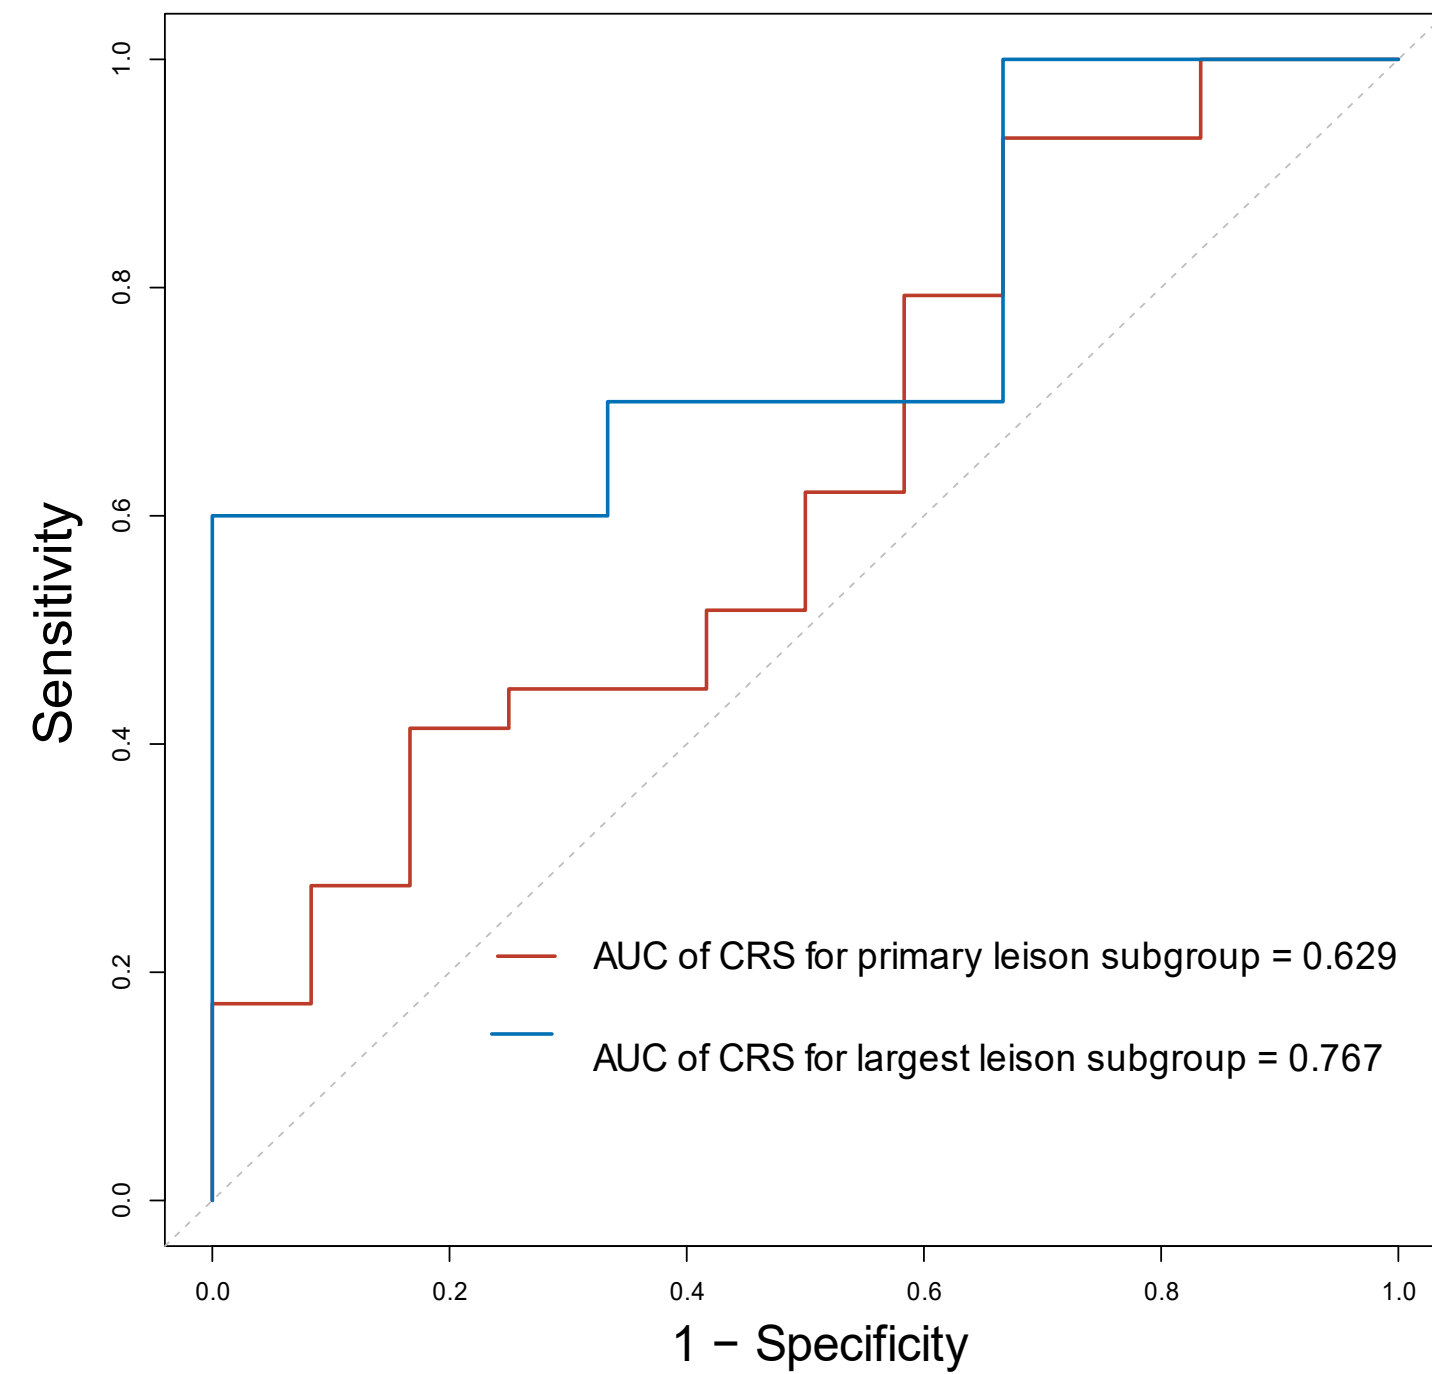**B. ROC of subgroup analysis for leison choice in cohort D3**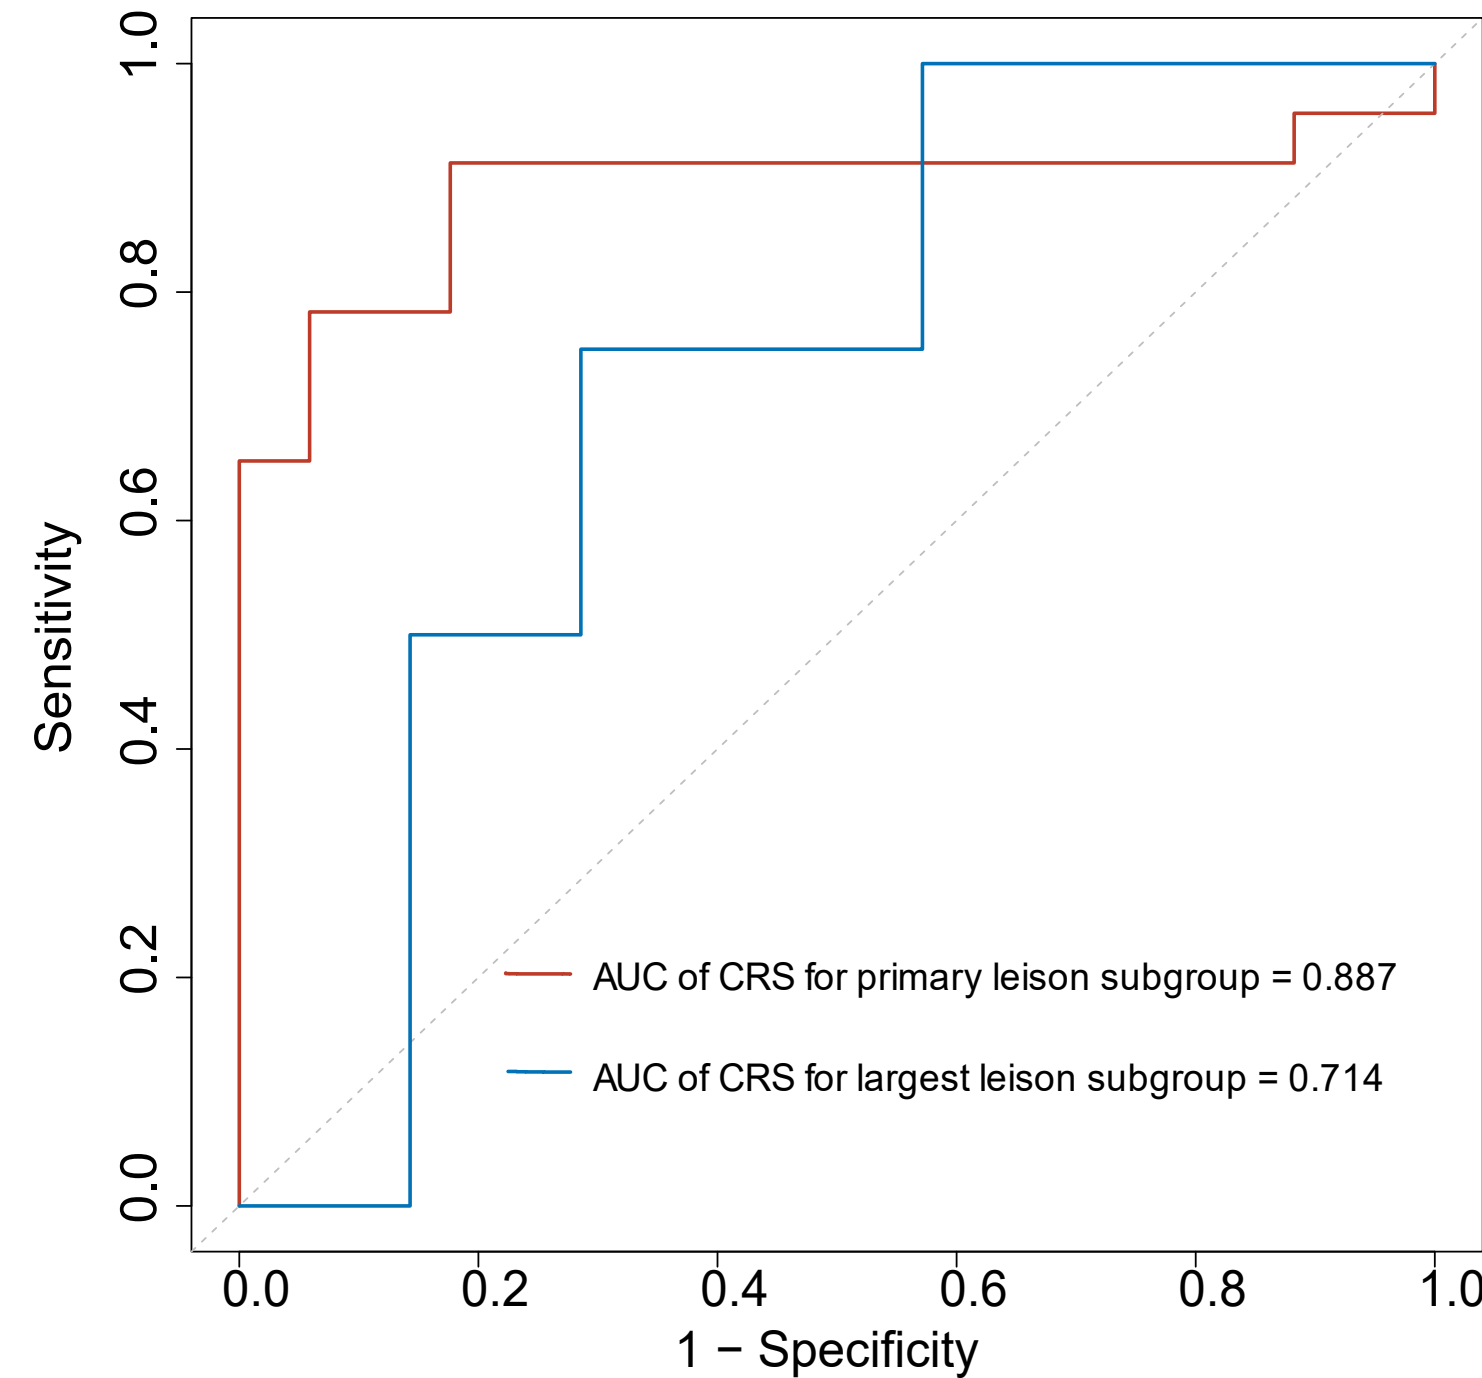**C. ROC of subgroup analysis for leison choice in external cohorts**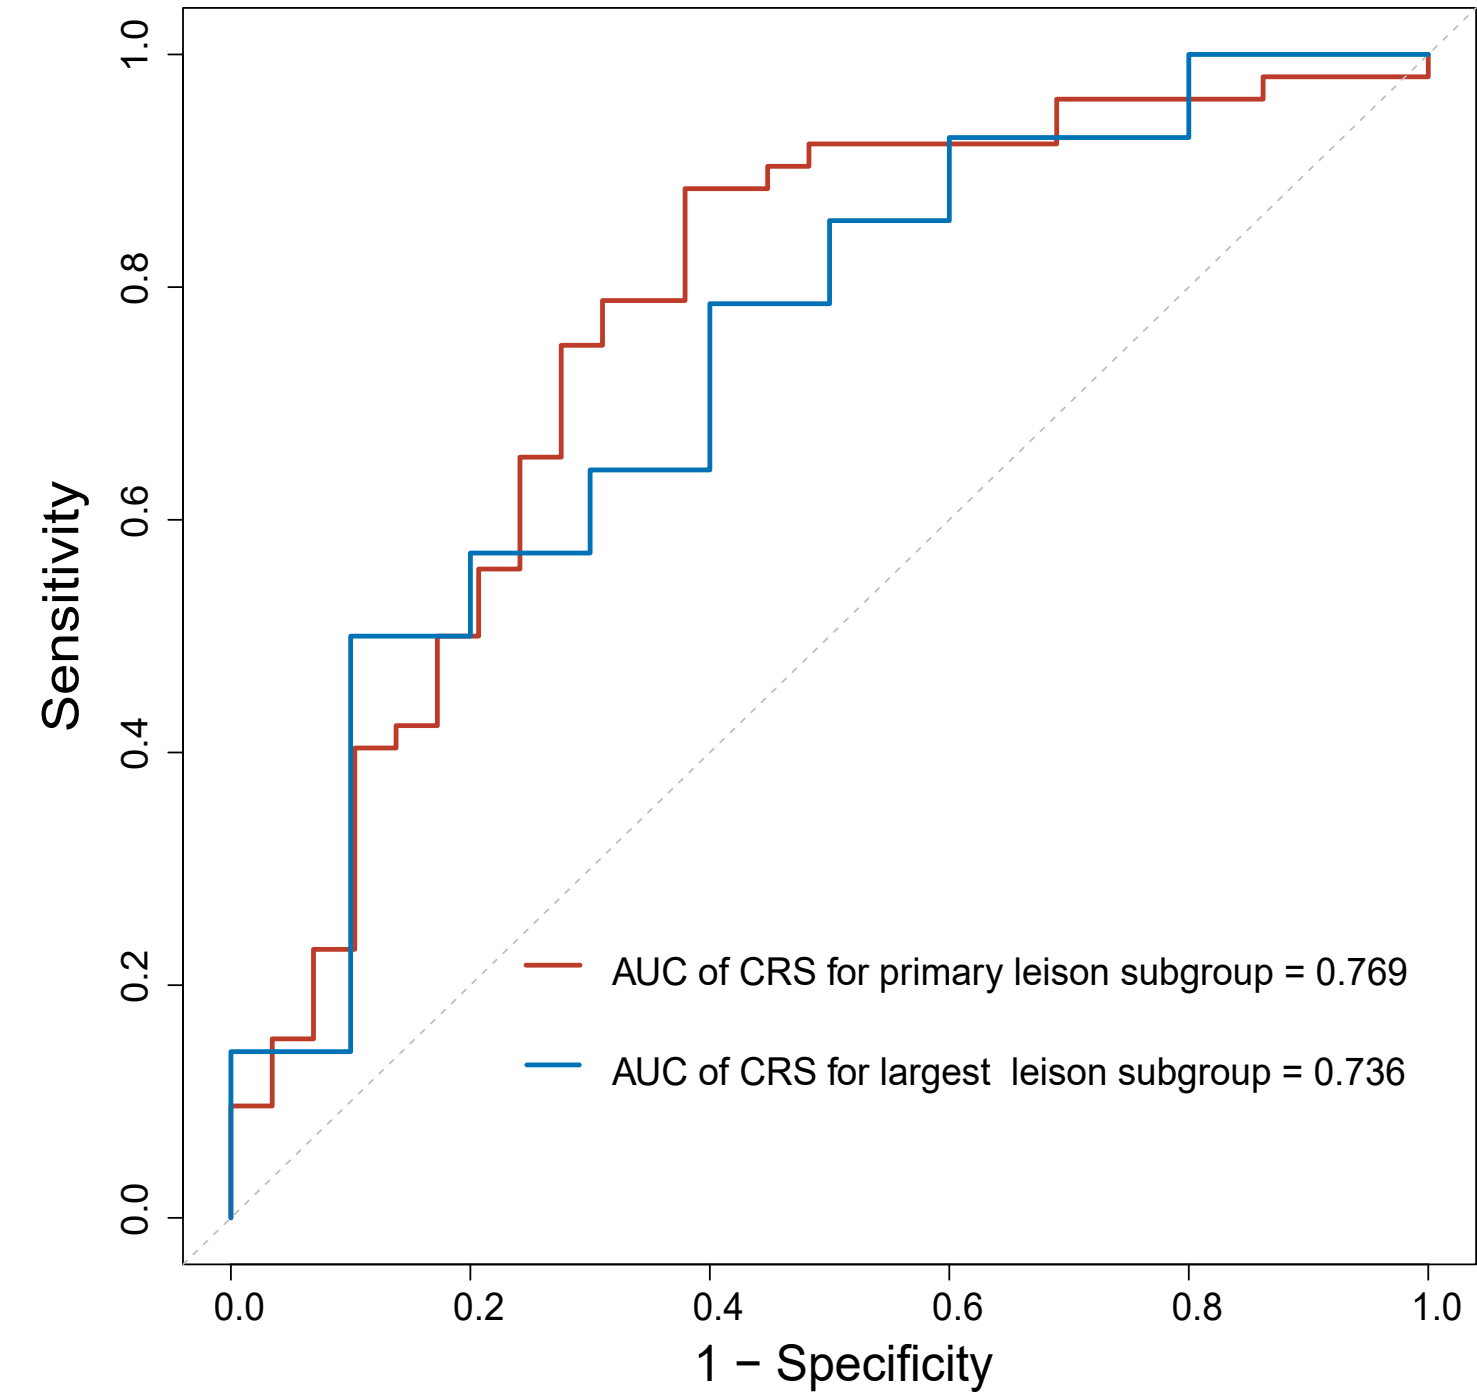

Supplement: jitc-2023-007369supp011.pdf [file jitc-2023-007369supp011.pdf]
