# Supplementary material for: Pretreatment radiomic biomarker for immunotherapy responder prediction in stage IB–IV NSCLC (LCDigital-IO Study): a multicenter retrospective study
Source: PubMed Central journal article supplement — J Immunother Cancer. 2023 Oct 20;11(10):e007369. doi: 10.1136/jitc-2023-007369 (PMC10603353; doi:10.1136/jitc-2023-007369), 2023-10-20
Supplement: jitc-2023-007369supp012.pdf [file jitc-2023-007369supp012.pdf]

Table S1. Clinicopathological characteristics of D1-D3

|                              | D1<br>(N=214) | D2<br>(N=54) | D3<br>(N=51) | Total<br>(N=319) |
|------------------------------|---------------|--------------|--------------|------------------|
| <b>Gender</b>                |               |              |              |                  |
| Male                         | 176 (82.2%)   | 49 (90.7%)   | 37 (72.5%)   | 262 (82.1%)      |
| Female                       | 38 (17.8%)    | 5 (9.3%)     | 14 (27.5%)   | 57 (17.9%)       |
| <b>Age</b>                   |               |              |              |                  |
| Mean (SD)                    | 58.1 (13.5)   | 61.3 (9.86)  | 62.0 (7.80)  | 59.3 (12.3)      |
| <b>BMI</b>                   |               |              |              |                  |
| Mean (SD)                    | 21.6 (2.98)   | 22.1 (3.03)  | 25.6 (19.7)  | 22.3 (8.47)      |
| Missing                      | 4 (1.9%)      | 3 (5.6%)     | 0 (0%)       | 7 (2.2%)         |
| <b>Smoking status</b>        |               |              |              |                  |
| Never smoked                 | 101 (47.2%)   | 18 (33.3%)   | 23 (45.1%)   | 142 (44.5%)      |
| Current or former smoker     | 113 (52.8%)   | 36 (66.7%)   | 28 (54.9%)   | 177 (55.5%)      |
| <b>Tumor histologic type</b> |               |              |              |                  |
| LUAD                         | 165 (77.1%)   | 30 (55.6%)   | 19 (37.3%)   | 214 (67.1%)      |
| LUSC                         | 49 (22.9%)    | 24 (44.4%)   | 32 (62.7%)   | 105 (32.9%)      |
| <b>Clinical stage</b>        |               |              |              |                  |
| III                          | 21 (9.8%)     | 15 (27.8%)   | 5 (9.8%)     | 41 (12.9%)       |
| IVA                          | 77 (36.0%)    | 25 (46.3%)   | 5 (9.8%)     | 107 (33.5%)      |
| IVB                          | 116 (54.2%)   | 14 (25.9%)   | 41 (80.4%)   | 171 (53.6%)      |
| <b>Lines of therapy</b>      |               |              |              |                  |
| First line                   | 65 (30.4%)    | 40 (74.1%)   | 45 (88.2%)   | 150 (47.0%)      |
| Second line or more          | 149 (69.6%)   | 14 (25.9%)   | 6 (11.8%)    | 169 (53.0%)      |
| <b>ICIs</b>                  |               |              |              |                  |
| anti PD-1                    | 178 (83.2%)   | 51 (94.4%)   | 51 (100%)    | 280 (87.8%)      |
| anti PD-L1                   | 36 (16.8%)    | 3 (5.6%)     | 0 (0%)       | 39 (12.2%)       |

SD=standard deviation. BMI=body mass index. LUAD=lung adenocarcinoma. LUSC=lung squamous cell carcinoma. LOT=line of therapy. ICIs=immune checkpoint inhibitors. PD-1=programmed death-1. PD-L1=programmed cell death-ligand 1
