# Supplementary material for: Pretreatment radiomic biomarker for immunotherapy responder prediction in stage IB–IV NSCLC (LCDigital-IO Study): a multicenter retrospective study
Source: PubMed Central journal article supplement — J Immunother Cancer. 2023 Oct 20;11(10):e007369. doi: 10.1136/jitc-2023-007369 (PMC10603353; doi:10.1136/jitc-2023-007369), 2023-10-20
Supplement: jitc-2023-007369supp013.pdf [file jitc-2023-007369supp013.pdf]

Table S2. The comparison of performance of different radiomic signatures

| Cohort                            | Signature | Sensitivity (Sen.) | Specificity (Spe.) | Positive predictive value (PPV) | Negative predictive value (NPV) | Accuracy (Acc.) | AUC (95%CI)         |
|-----------------------------------|-----------|--------------------|--------------------|---------------------------------|---------------------------------|-----------------|---------------------|
| Training Cohort (n=149)           | Clinical  | 0.863              | 0.639              | 0.629                           | 0.868                           | 0.732           | 0.760 (0.674-0.846) |
|                                   | TRS       | 0.612              | 0.659              | 0.594                           | 0.675                           | 0.638           | 0.641 (0.553-0.730) |
|                                   | CRS-5 mm  | 0.776              | 0.683              | 0.667                           | 0.789                           | 0.725           | 0.759 (0.683-0.836) |
|                                   | CRS-10 mm | 0.925              | 0.659              | 0.689                           | 0.915                           | 0.779           | 0.836 (0.772-0.901) |
|                                   | CRS-15 mm | 0.806              | 0.817              | 0.783                           | 0.838                           | 0.812           | 0.866 (0.809-0.922) |
|                                   | CRS-20 mm | 0.821              | 0.683              | 0.679                           | 0.824                           | 0.745           | 0.817 (0.750-0.884) |
|                                   | Nomogram  | 0.843              | 0.722              | 0.682                           | 0.867                           | 0.772           | 0.837 (0.768-0.907) |
| Internal validation Cohort (n=65) | Clinical  | 0.586              | 0.826              | 0.809                           | 0.613                           | 0.692           | 0.660 (0.509-0.811) |
|                                   | TRS       | 0.794              | 0.516              | 0.594                           | 0.675                           | 1.462           | 0.647 (0.510-0.784) |
|                                   | CRS-5 mm  | 0.765              | 0.548              | 0.650                           | 0.680                           | 0.662           | 0.698 (0.571-0.826) |
|                                   | CRS-10 mm | 0.853              | 0.452              | 0.631                           | 0.737                           | 0.662           | 0.664 (0.531-0.797) |
|                                   | CRS-15 mm | 0.588              | 0.677              | 0.666                           | 0.600                           | 0.630           | 0.641 (0.505-0.778) |
|                                   | CRS-20 mm | 0.412              | 0.968              | 0.934                           | 0.600                           | 0.677           | 0.752 (0.636-0.869) |
|                                   | Nomogram  | 0.552              | 0.913              | 0.889                           | 0.618                           | 0.712           | 0.790 (0.669-0.911) |
| Independent validation cohort D2  | Nomogram  | 0.821              | 0.667              | 0.865                           | 0.589                           | 0.778           | 0.781 (0.651-0.911) |

TRS: Tumor radiomic signature

CRS: Combined radiomic signature
