# Supplementary material for: Pretreatment radiomic biomarker for immunotherapy responder prediction in stage IB–IV NSCLC (LCDigital-IO Study): a multicenter retrospective study
Source: PubMed Central journal article supplement — J Immunother Cancer. 2023 Oct 20;11(10):e007369. doi: 10.1136/jitc-2023-007369 (PMC10603353; doi:10.1136/jitc-2023-007369), 2023-10-20
Supplement: jitc-2023-007369supp014.pdf [file jitc-2023-007369supp014.pdf]

**Table S3. The comparison of performance of different peri-tumoral radiomic signatures based on AIC and DeLong test**

| Models   | AIC   | DeLong Test (compared to CRS_20mm) |                   |
|----------|-------|------------------------------------|-------------------|
|          |       | Training cohort                    | Validation cohort |
| CRS_5mm  | 186.8 | <0.05                              | 0.306             |
| CRS_10mm | 167.8 | 0.313                              | <0.05             |
| CRS_15mm | 157.7 | 0.060                              | <0.05             |
| CRS_20mm | 153.2 | /                                  | /                 |

AIC, Akaike information criterion
