# Supplementary material for: Pretreatment radiomic biomarker for immunotherapy responder prediction in stage IB–IV NSCLC (LCDigital-IO Study): a multicenter retrospective study
Source: PubMed Central journal article supplement — J Immunother Cancer. 2023 Oct 20;11(10):e007369. doi: 10.1136/jitc-2023-007369 (PMC10603353; doi:10.1136/jitc-2023-007369), 2023-10-20
Supplement: jitc-2023-007369supp015.pdf [file jitc-2023-007369supp015.pdf]

**Supple table.4a. The coefficient of p value for Log-Rank test in clinical variables on PFS**

| P value                                       | Age   | Gender | Histological type | Clinical stage | Smoking status | ICIs type | NLRpost | LOT   | ECOG PS | BMI   |
|-----------------------------------------------|-------|--------|-------------------|----------------|----------------|-----------|---------|-------|---------|-------|
| Clinical characteristic in two-variable model | 0.640 | 0.076  | 0.368             | 0.013          | 0.091          | 0.283     | 0.000   | 0.001 | 0.001   | 0.260 |
| RAD in two-variable model                     | 0.002 | 0.012  | 0.002             | 0.002          | 0.004          | 0.001     | 0.003   | 0.003 | 0.001   | 0.002 |
| Two-variable model                            | 0.007 | 0.002  | 0.005             | 0.001          | 0.002          | 0.004     | 0.000   | 0.000 | 0.000   | 0.005 |

**Supple table.4b. The coefficient of HR for Log-Rank test in clinical variables on PFS**

| HR                                            | Age   | Gender | Histological type | Clinical stage | Smoking status | ICIs type | NLRpost | LOT   | ECOG PS | BMI   |
|-----------------------------------------------|-------|--------|-------------------|----------------|----------------|-----------|---------|-------|---------|-------|
| Clinical characteristic in two-variable model | 1.003 | 0.702  | 0.854             | 0.668          | 1.292          | 0.805     | 1.074   | 1.759 | 0.435   | 0.970 |
| RAD in two-variable model                     | 0.429 | 0.495  | 0.427             | 0.439          | 0.454          | 0.417     | 0.418   | 0.445 | 0.424   | 0.425 |

**Supple table.4c. The coefficient of p value for Log-Rank test in clinical variables on OS**

| P value                                       | Age   | Gender | Histological type | Clinical stage | Smoking status | ICIs type | NLRpost | LOT   | ECO PS | BMI   |
|-----------------------------------------------|-------|--------|-------------------|----------------|----------------|-----------|---------|-------|--------|-------|
| Clinical characteristic in two-variable model | 0.814 | 0.162  | 0.747             | 0.199          | 0.098          | 0.476     | 0.051   | 0.009 | 0.000  | 0.790 |
| RAD in two-variable model                     | 0.020 | 0.065  | 0.019             | 0.029          | 0.036          | 0.017     | 0.001   | 0.029 | 0.017  | 0.016 |
| Two-variable model                            | 0.064 | 0.026  | 0.058             | 0.060          | 0.017          | 0.051     | 0.001   | 0.002 | 0.000  | 0.052 |

**Supple table.4d. The coefficient of HR for Log-Rank test in clinical variables on OS**

| HR                                            | Age   | Gender | Histological type | Clinical stage | Smoking status | ICIs type | NLRpost | LOT   | ECOG PS | BMI   |
|-----------------------------------------------|-------|--------|-------------------|----------------|----------------|-----------|---------|-------|---------|-------|
| Clinical characteristic in two-variable model | 1.001 | 0.728  | 0.937             | 0.788          | 1.331          | 0.849     | 0.511   | 1.694 | 0.373   | 0.992 |
| RAD in two-variable model                     | 0.486 | 0.551  | 0.480             | 0.507          | 0.517          | 0.477     | 1.059   | 0.511 | 0.478   | 0.465 |

**Supple table.4e. The univariate coefficient of HR and P value for Log-Rank test in variables on OS**

|         | CRS   | Age   | Gender | Histological type | Clinical stage | Smoking status | LOT   | ICIs type | NLRpost | BMI   |
|---------|-------|-------|--------|-------------------|----------------|----------------|-------|-----------|---------|-------|
| HR      | 0.487 | 1.001 | 0.642  | 0.937             | 0.767          | 1.394          | 1.730 | 0.892     | 1.065   | 0.992 |
| P value | 0.020 | 0.825 | 0.040  | 0.747             | 0.152          | 0.054          | 0.006 | 0.619     | 0.000   | 0.793 |

**Supple table.4f. The univariate coefficient of HR and P value for Log-Rank test in variables on PFS**

|         | CRS   | Age   | Gender | Histological type | Clinical stage | Smoking status | ICIs type | NLRpost | LOT   | BMI   |
|---------|-------|-------|--------|-------------------|----------------|----------------|-----------|---------|-------|-------|
| HR      | 0.433 | 1.001 | 0.602  | 0.883             | 0.662          | 0.976          | 0.873     | 1.073   | 1.784 | 0.976 |
| p value | 0.002 | 0.786 | 0.008  | 0.475             | 0.011          | 0.363          | 0.499     | 0.000   | 0.001 | 0.363 |
