# Supplementary material for: Pretreatment radiomic biomarker for immunotherapy responder prediction in stage IB–IV NSCLC (LCDigital-IO Study): a multicenter retrospective study
Source: PubMed Central journal article supplement — J Immunother Cancer. 2023 Oct 20;11(10):e007369. doi: 10.1136/jitc-2023-007369 (PMC10603353; doi:10.1136/jitc-2023-007369), 2023-10-20
Supplement: jitc-2023-007369supp016.pdf [file jitc-2023-007369supp016.pdf]

**Table S5a. Odds ratio for DCB of clinical variables via univariate and multivariate logistics analysis**

| Variable              | Univariate          |                   | Multivariate        |       |
|-----------------------|---------------------|-------------------|---------------------|-------|
|                       | OR (95% CI)         | P                 | OR (95% CI)         | P     |
| Tumor histologic type | 0.887 (0.468-1.683) | 0.714             | -                   | -     |
| Age (year)            | 1.000 (0.973-1.028) | 0.981             | -                   | -     |
| Gender                | 0.334 (0.153-0.728) | <b>0.006</b>      | 0.622 (0.240-1.613) | 0.329 |
| Smoking status        | 2.445 (1.408-4.247) | <b>0.002</b>      | 1.769 (0.885-3.538) | 0.106 |
| BMI                   | 1.034 (0.945-1.132) | 0.464             | -                   | -     |
| Clinical stage        | 0.524 (0.344-0.800) | <b>0.003</b>      | 0.638 (0.394-1.033) | 0.068 |
| EGFR mutation         | 0.777 (0.329-1.836) | 0.565             | -                   | -     |
| Monotherapy           | 1.220 (0.625-2.382) | 0.56              | -                   | -     |
| LOT                   | 0.359 (0.196-0.658) | <b>0.001</b>      | 0.559 (0.265-1.181) | 0.127 |
| CEA                   | 1.000 (0.998-1.001) | 0.523             | -                   | -     |
| NSE                   | 0.986 (0.964-1.009) | 0.239             | -                   | -     |
| Hb                    | 1.007 (0.995-1.019) | 0.265             | -                   | -     |
| NLR-pre               | 0.977 (0.932-1.025) | 0.346             | -                   | -     |
| NLR-post              | 0.831 (0.749-0.922) | <b>&lt; 0.001</b> | 0.846 (0.761-0.940) | 0.002 |

BMI=body mass index. EGFR=epidermal growth factor receptor. LOT=line of therapy. CEA=carcinoembryonic antigen. NSE=neuron specific enolase. Hb=hemoglobin. NLR=neutrophil-lymphocyte Ratio.

**Table S5b. Odds ratio for DCB of clinical variables via multivariate logistics analysis in each cohort of advanced NSCLC**

| Variable              | D1                     |       | D2                      |       | D3                     |       |
|-----------------------|------------------------|-------|-------------------------|-------|------------------------|-------|
|                       | HR (95% CI)            | P     | HR (95% CI)             | P     | HR (95% CI)            | P     |
| <b>Gender</b>         | 0.622<br>(0.240-1.613) | 0.329 | 0.956<br>(0.088-10.393) | 0.970 | 0.541<br>(0.065-4.501) | 0.570 |
| <b>Smoking status</b> | 1.769<br>(0.885-3.538) | 0.106 | 1.795<br>(0.391-8.234)  | 0.452 | 0.681<br>(0.100-4.637) | 0.695 |
| <b>Clinical stage</b> | 0.638<br>(0.394-1.033) | 0.068 | 1.103<br>(0.414-2.938)  | 0.845 | 0.415<br>(0.180-0.959) | 0.039 |
| <b>LOT</b>            | 0.559<br>(0.265-1.181) | 0.127 | 0.457<br>(0.077-2.727)  | 0.391 | 0.559<br>(0.265-1.181) | 0.127 |
| <b>NLR-post</b>       | 0.846<br>(0.761-0.940) | 0.002 | 0.614<br>(0.389-0.969)  | 0.036 | 0.514<br>(0.272-0.971) | 0.040 |

LOT=line of therapy. NLR\_post=neutrophil-lymphocyte ratio after first cycle of ICIs therapy.
