# Supplementary material for: Pretreatment radiomic biomarker for immunotherapy responder prediction in stage IB–IV NSCLC (LCDigital-IO Study): a multicenter retrospective study
Source: PubMed Central journal article supplement — J Immunother Cancer. 2023 Oct 20;11(10):e007369. doi: 10.1136/jitc-2023-007369 (PMC10603353; doi:10.1136/jitc-2023-007369), 2023-10-20
Supplement: jitc-2023-007369supp017.pdf [file jitc-2023-007369supp017.pdf]

**Supple table.6a. Correlations among volume, CRS and DCB**

|        |                     | volume | CRS          | DCB               |
|--------|---------------------|--------|--------------|-------------------|
| Volume | Pearson Correlation | /      | 0.117        | 0.036             |
|        | p value             | /      | <b>0.088</b> | <b>0.603</b>      |
| CRS    | Pearson Correlation | 0.117  | /            | .245**            |
|        | p value             | 0.088  | /            | <b>&lt; 0.001</b> |

\*\* . Correlation is significant at the 0.01 level.

**Supple table.6b. The coefficient for logistics regression of tumor volume on DCB**

|              |            | HR    | p value |
|--------------|------------|-------|---------|
| CRS          | Univariate | 6.378 | < 0.001 |
|              | Bivariate  | 6.338 | < 0.001 |
| Tumor volume | Univariate | 1     | 0.857   |
|              | Bivariate  | 1     | 0.917   |

**Supple table.6c. The coefficient for Log-Rank test in tumor volume on PFS and OS**

|              |            | PFS   |         | OS    |         |
|--------------|------------|-------|---------|-------|---------|
|              |            | HR    | p value | HR    | p value |
| CRS          | Univariate | 0.433 | 0.002   | 0.487 | 0.020   |
|              | Bivariate  | 0.487 | 0.002   | 0.487 | 0.022   |
| Tumor volume | Univariate | 1.000 | 0.948   | 1.000 | 0.753   |
|              | Bivariate  | 1.000 | 0.750   | 1.000 | 0.997   |
