# Supplementary material for: Pretreatment radiomic biomarker for immunotherapy responder prediction in stage IB–IV NSCLC (LCDigital-IO Study): a multicenter retrospective study
Source: PubMed Central journal article supplement — J Immunother Cancer. 2023 Oct 20;11(10):e007369. doi: 10.1136/jitc-2023-007369 (PMC10603353; doi:10.1136/jitc-2023-007369), 2023-10-20
Supplement: jitc-2023-007369supp018.pdf [file jitc-2023-007369supp018.pdf]

**Table S7** The performance of different algorithms on training set and validation set.

| <b>Classifier</b>   | <b>Feature Selection</b> | <b>Training AUC</b> | <b>Validation AUC</b> |
|---------------------|--------------------------|---------------------|-----------------------|
| Logistic Regression | LASSO                    | 0.82                | 0.75                  |
| SVM                 | LASSO                    | 0.77                | 0.64                  |
| LDA                 | LASSO                    | 0.71                | 0.63                  |
| QDA                 | LASSO                    | 0.71                | 0.63                  |
| RF                  | LASSO                    | 1.00                | 0.57                  |
| SVM                 | RF                       | 0.90                | 0.63                  |
| Logistic Regression | RF                       | 0.77                | 0.67                  |

RF:

Random Forest; SVM: Support Vector Machines; LDA: Linear Discriminant Analysis;

QDA: Quadratic Discriminant Analysis; LASSO: Least absolute shrinkage and selection operator
