# Supplementary material for: Pretreatment radiomic biomarker for immunotherapy responder prediction in stage IB–IV NSCLC (LCDigital-IO Study): a multicenter retrospective study
Source: PubMed Central journal article supplement — J Immunother Cancer. 2023 Oct 20;11(10):e007369. doi: 10.1136/jitc-2023-007369 (PMC10603353; doi:10.1136/jitc-2023-007369), 2023-10-20
Supplement: jitc-2023-007369supp019.pdf [file jitc-2023-007369supp019.pdf]

**Table S8 Inter-observer variability analysis of radiomic feature extraction**

| <b>Feature</b> | <b>ICC</b> | <b>95%CI</b> | <b>p value</b> | <b>Agreement Level</b> |
|----------------|------------|--------------|----------------|------------------------|
| T710           | 0.96       | 0.921-0.982  | <0.001**       | Excellent              |
| T55            | 0.96       | 0.919-0.982  | <0.001**       | Excellent              |
| A457           | 0.98       | 0.970-0.993  | <0.001**       | Excellent              |
| A730           | 0.99       | 0.984-0.996  | <0.001**       | Excellent              |
| A765           | 0.98       | 0.949-0.988  | <0.001**       | Excellent              |
| X2A194         | 0.97       | 0.940-0.986  | <0.001**       | Excellent              |
| X2A752         | 0.72       | 0.394-0.865  | <0.001**       | good                   |
| X3A287         | 0.90       | 0.773-0.954  | <0.001**       | Excellent              |
| X4A193         | 0.99       | 0.985-0.997  | <0.001**       | Excellent              |

Abbreviations, ICC, Intraclass correlation efficient; CI, Confidence interval; \*\*, Significant at  $p < 0.01$ .
