# Supplementary figures and images for: Pretreatment radiomic biomarker for immunotherapy responder prediction in stage IB–IV NSCLC (LCDigital-IO Study): a multicenter retrospective study
Source: PubMed Central journal article supplement — J Immunother Cancer. 2023 Oct 20;11(10):e007369. doi: 10.1136/jitc-2023-007369 (PMC10603353; doi:10.1136/jitc-2023-007369), 2023-10-20

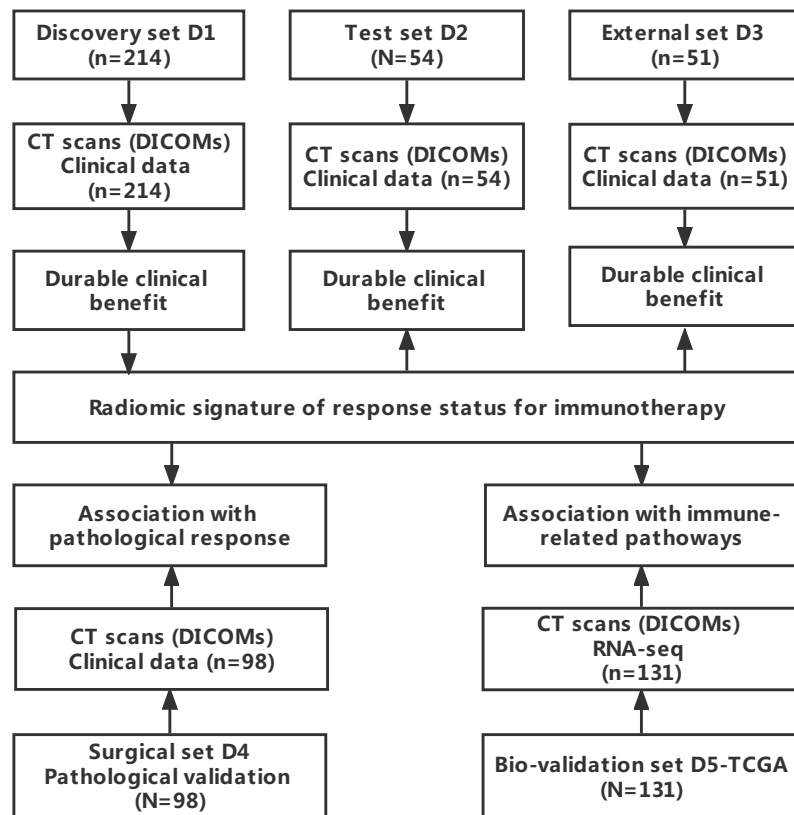

Supplement: jitc-2023-007369supp002.pdf [file jitc-2023-007369supp002.pdf]

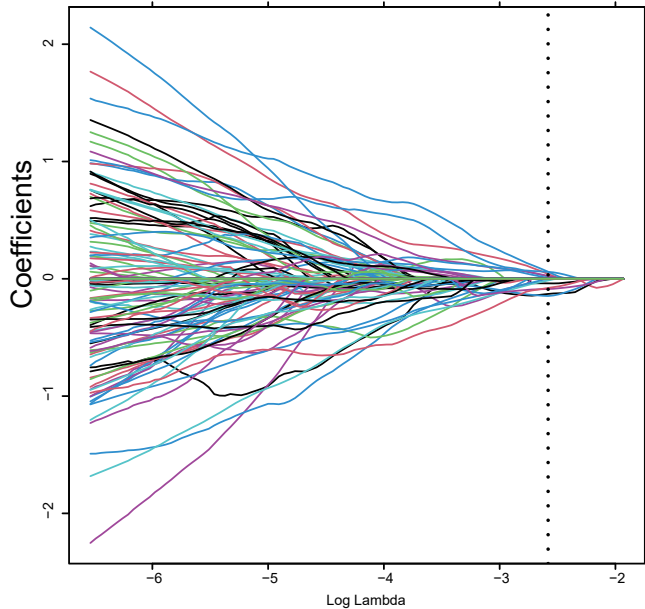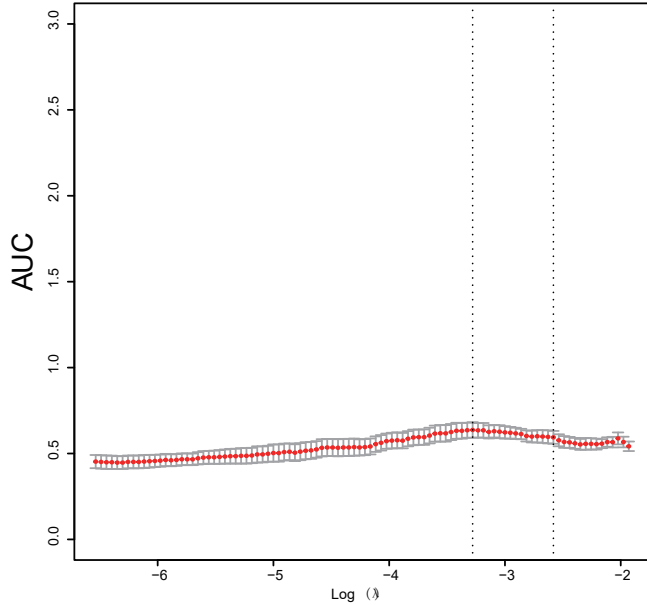

Supplement: jitc-2023-007369supp003.pdf [file jitc-2023-007369supp003.pdf]

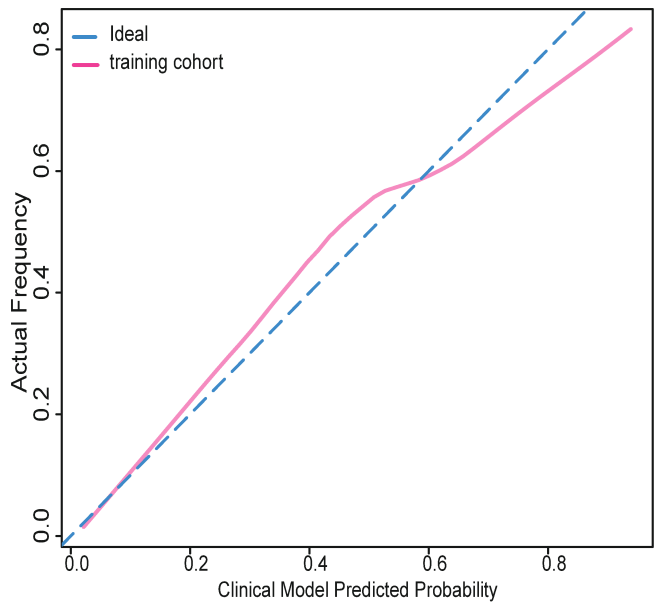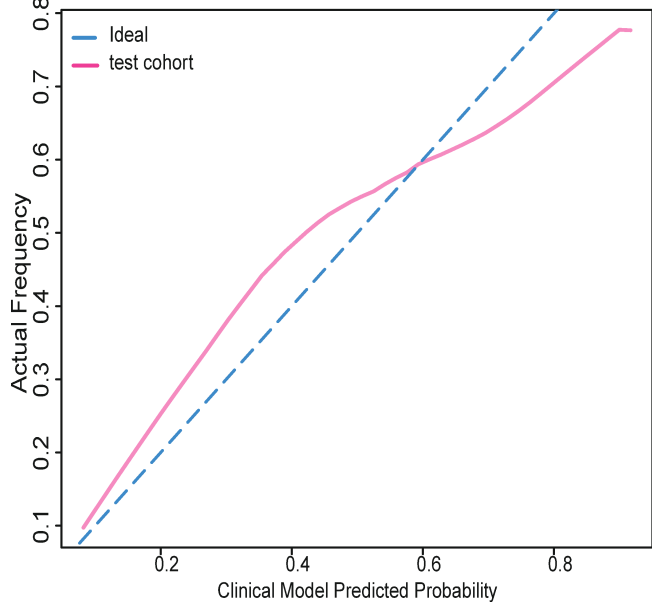

Supplement: jitc-2023-007369supp004.pdf [file jitc-2023-007369supp004.pdf]

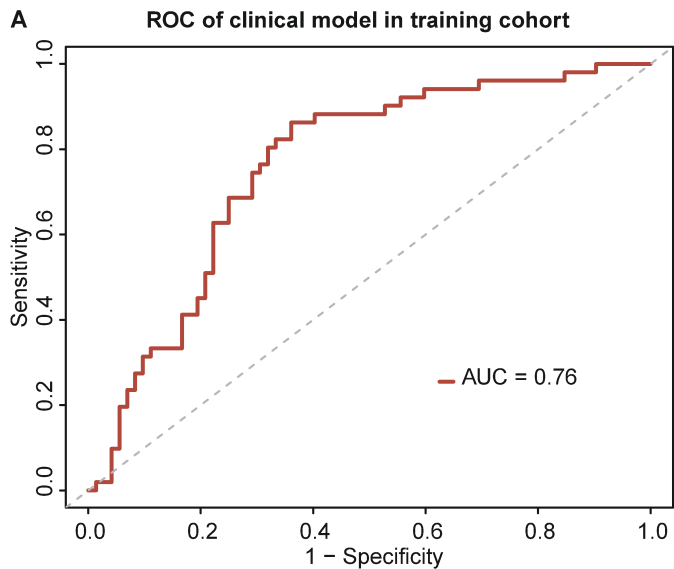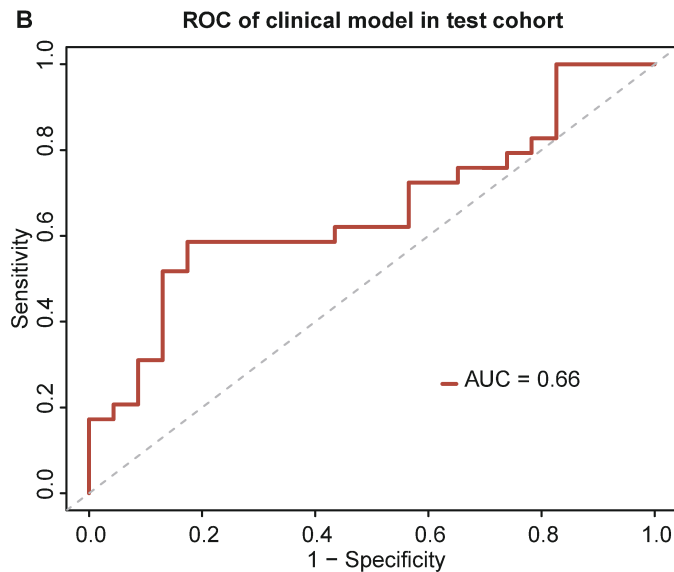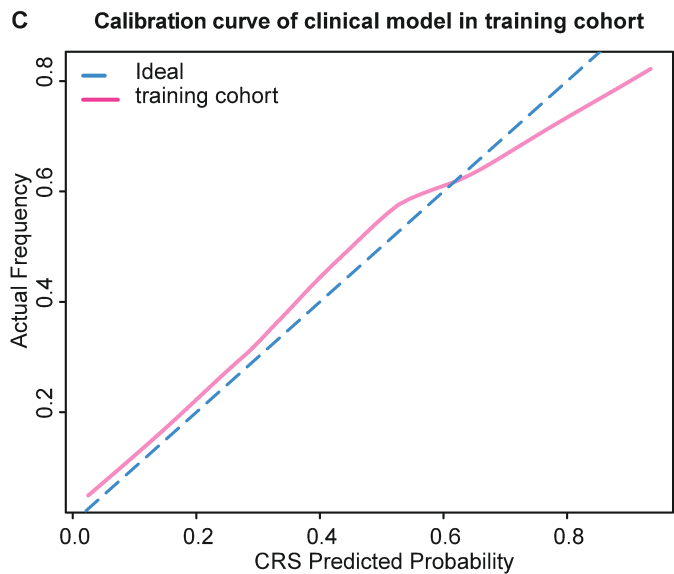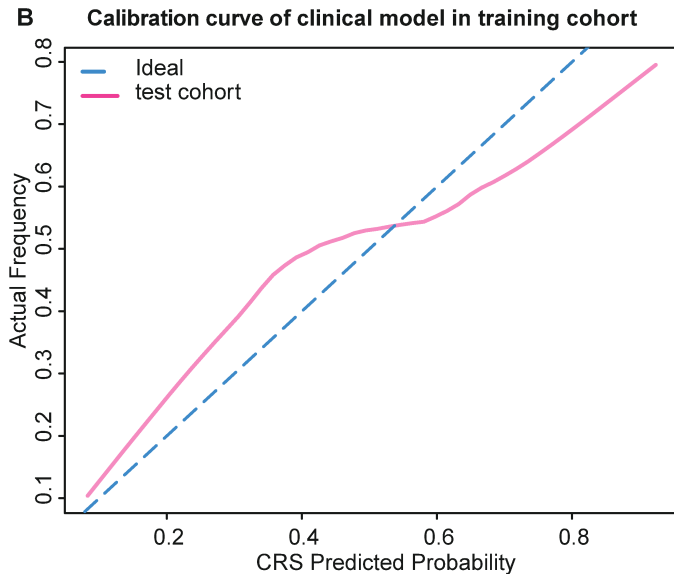

Supplement: jitc-2023-007369supp005.pdf [file jitc-2023-007369supp005.pdf]

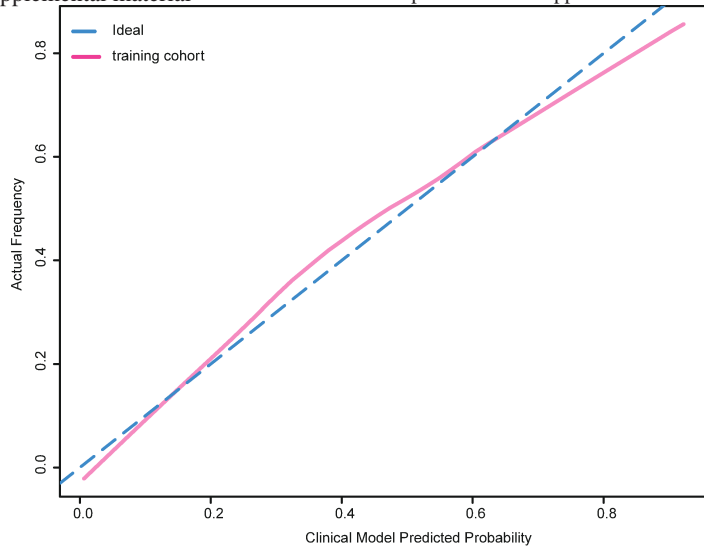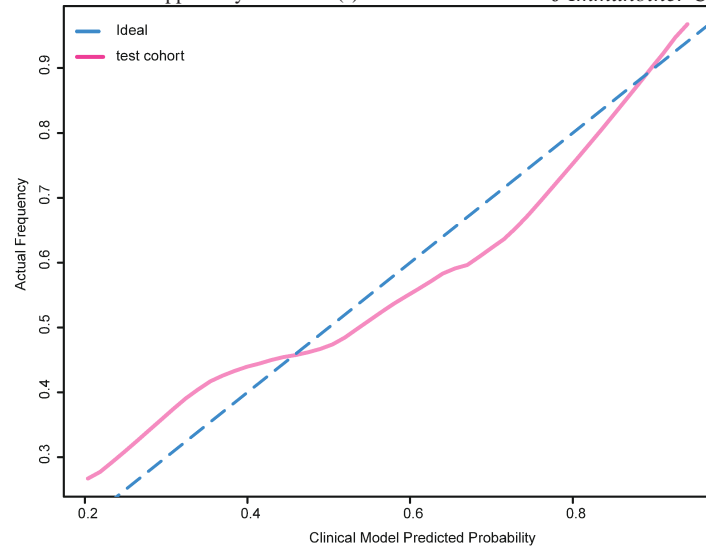

Supplement: jitc-2023-007369supp006.pdf [file jitc-2023-007369supp006.pdf]

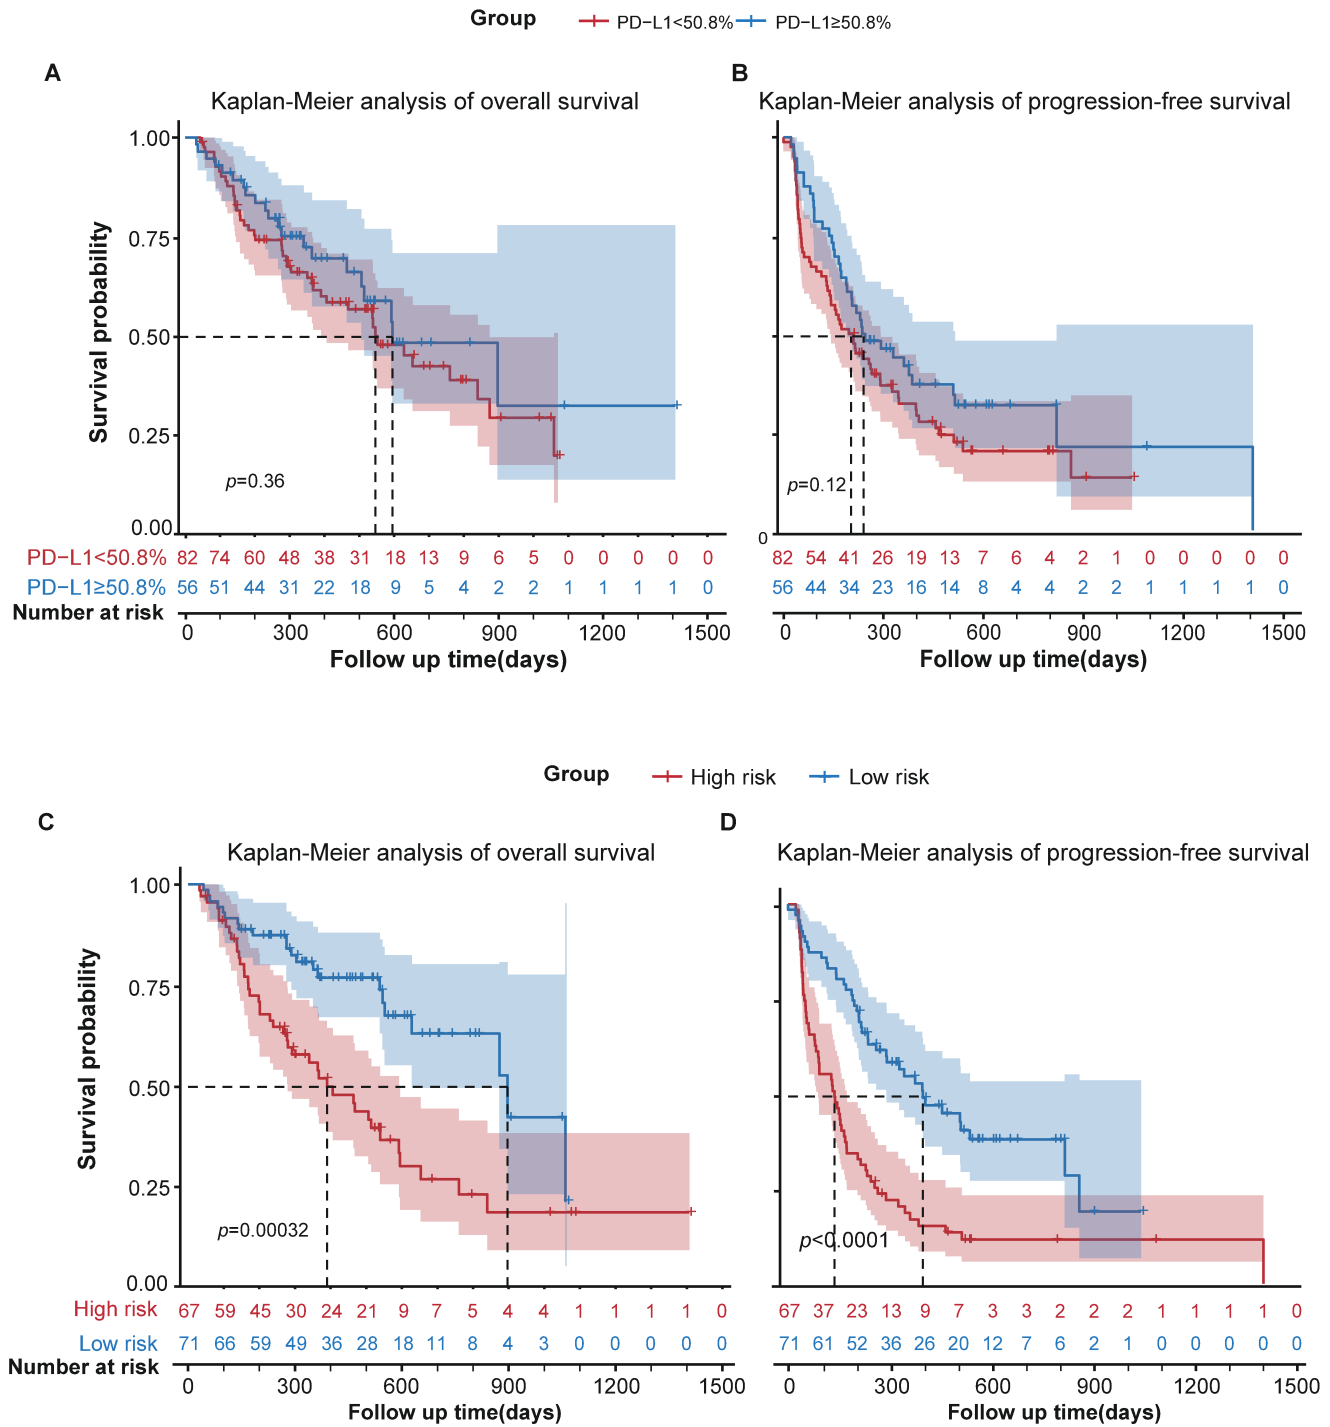

Supplement: jitc-2023-007369supp007.pdf [file jitc-2023-007369supp007.pdf]

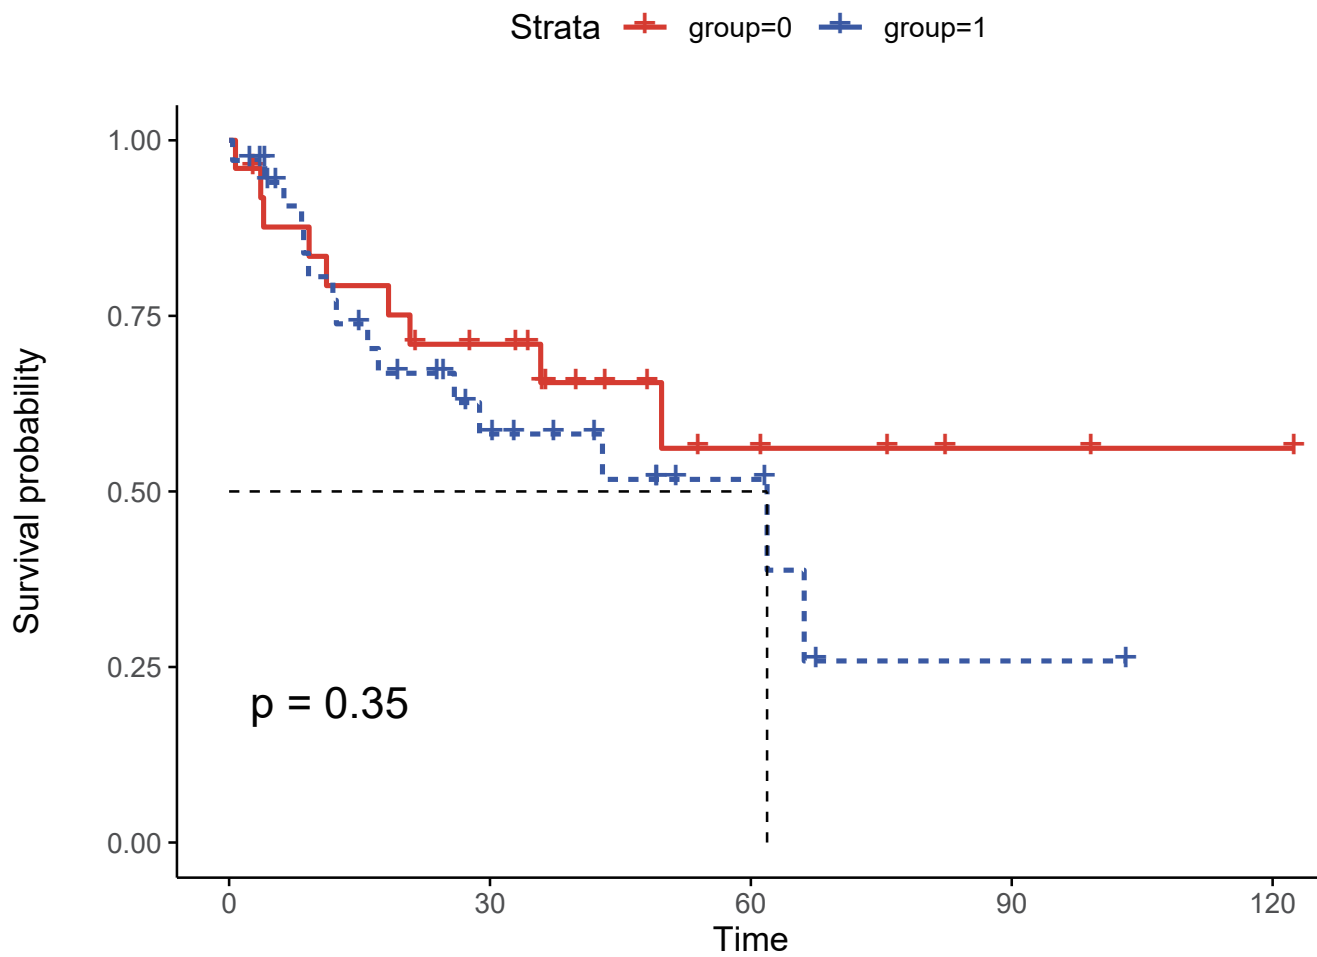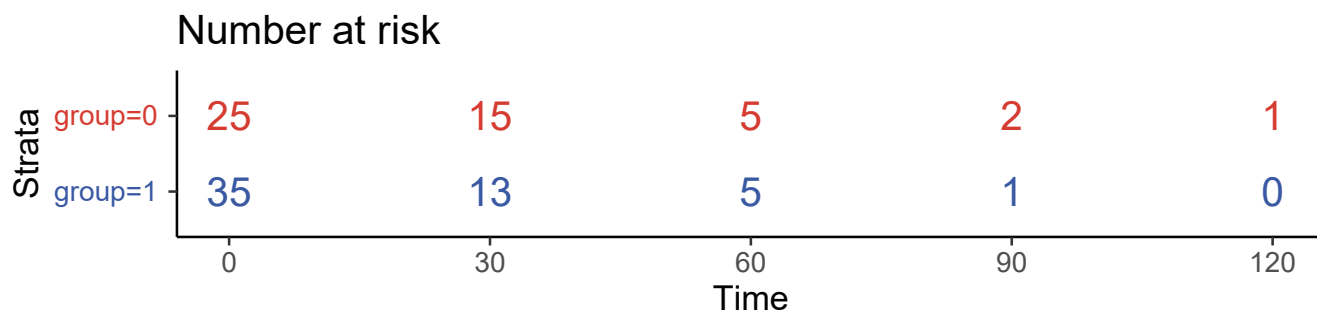

Supplement: jitc-2023-007369supp008.pdf [file jitc-2023-007369supp008.pdf]

## The Most Enriched GO Terms

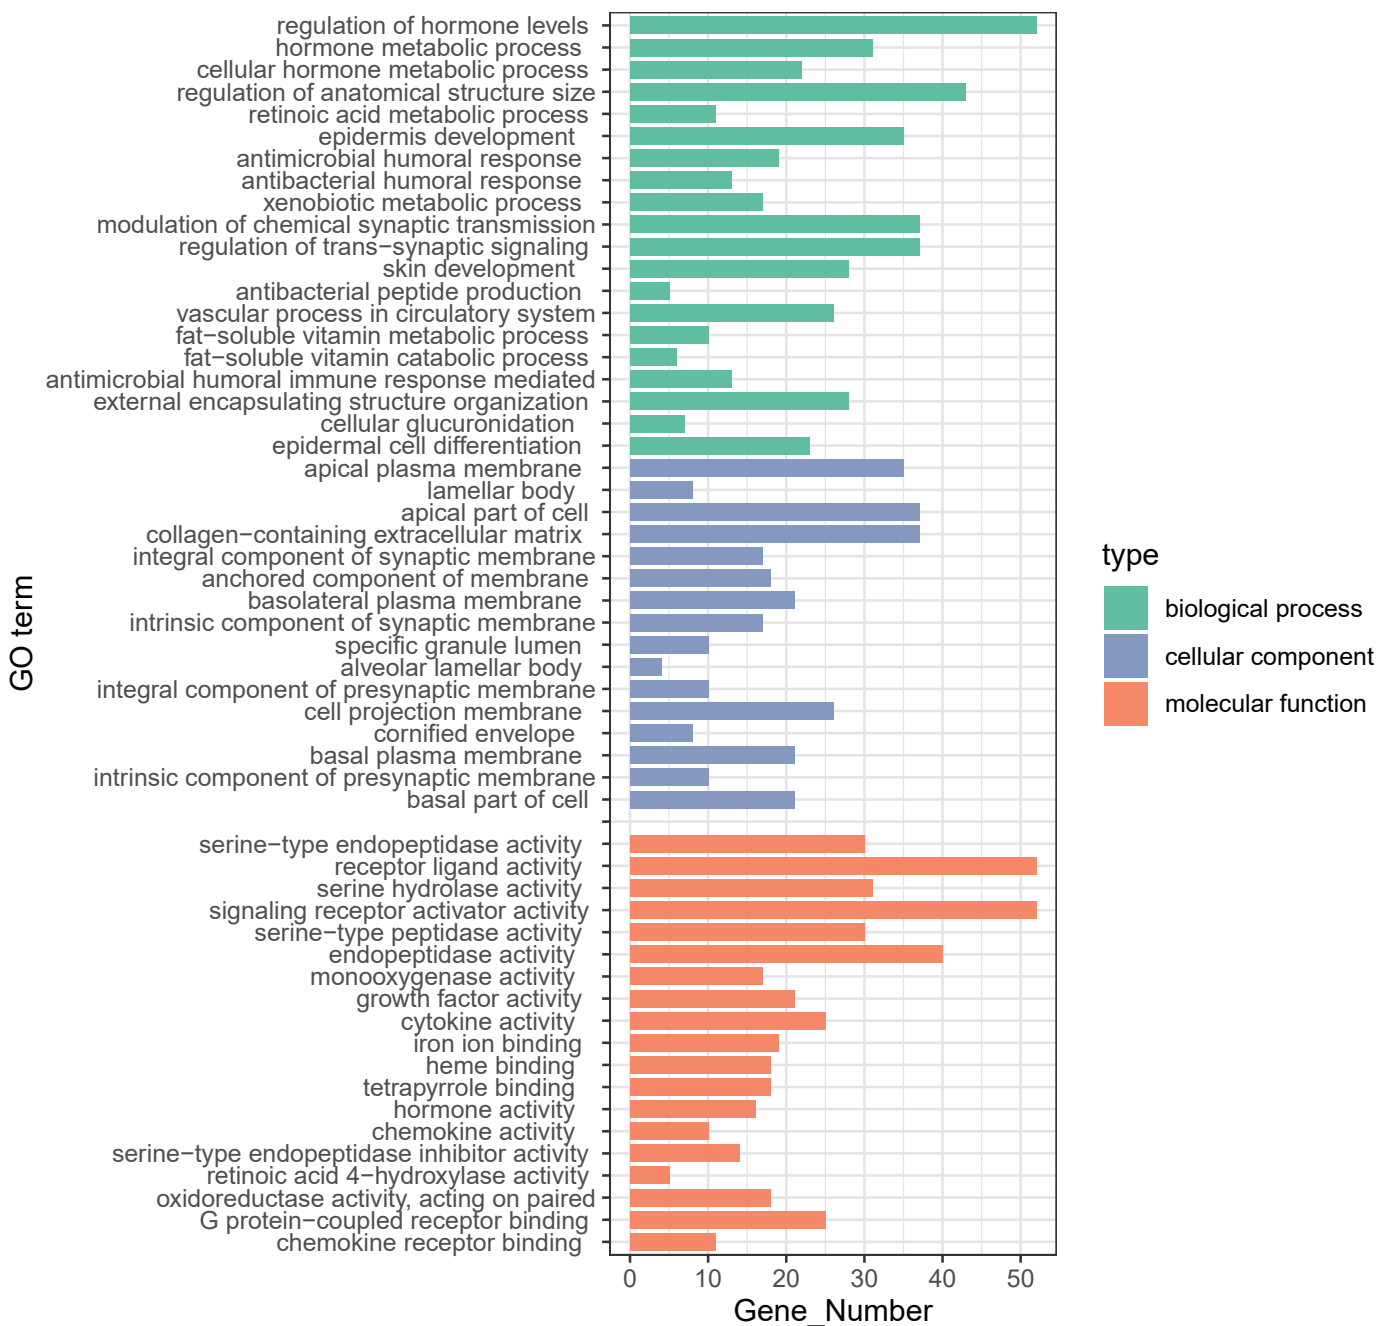

Supplement: jitc-2023-007369supp009.pdf [file jitc-2023-007369supp009.pdf]

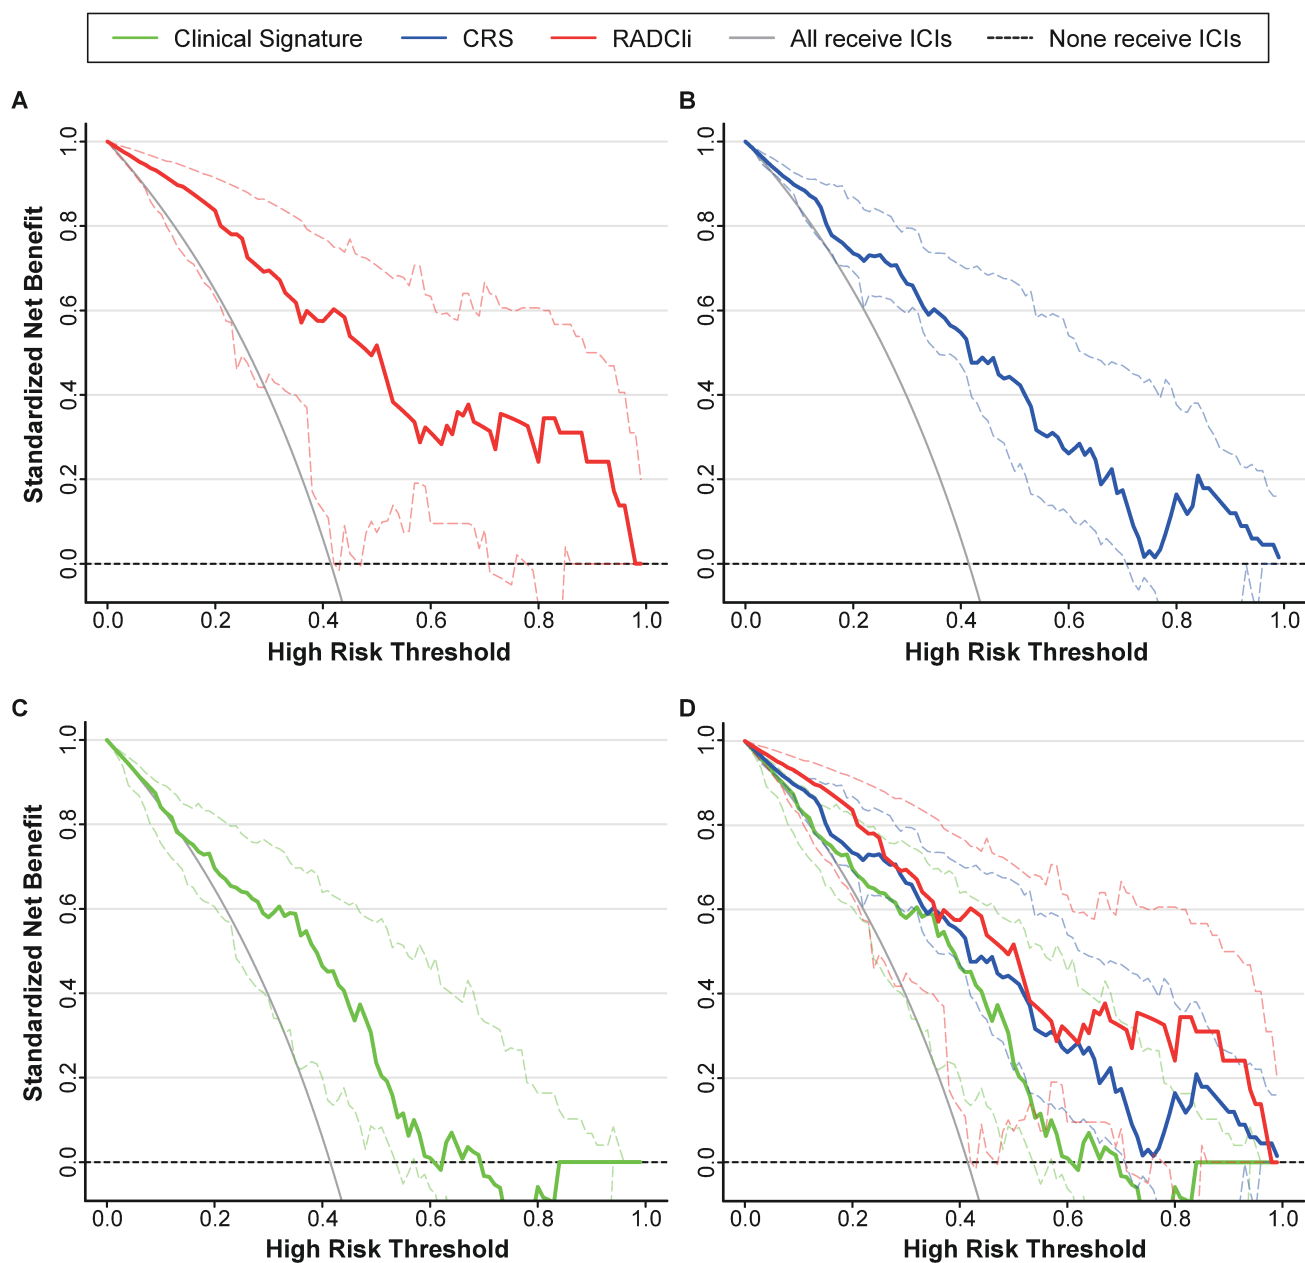

Supplement: jitc-2023-007369supp010.pdf [file jitc-2023-007369supp010.pdf]
